# Supplementary material
Source: MDPI journal article supplement (https://www.mdpi.com/2073-4441/14/14/2280)
Supplement: s1 [file s1 › water-1801186-supplementary.pdf]

# A comprehensive approach for floodplain mapping through identification of hazard using publicly available data sets over Canada

Mohit Prakash Mohanty <sup>1,2,\*</sup>, and Slobodan P. Simonovic <sup>2</sup>

<sup>1</sup> Department of Water Resources Development and Management, Indian Institute of Technology Roorkee, Roorkee 247 667, India

<sup>2</sup> Department of Civil and Environmental Engineering, Western University, London, ON N6A 3K7, Canada

\* Correspondence: mohit.mohanty@wr.iitr.ac.in

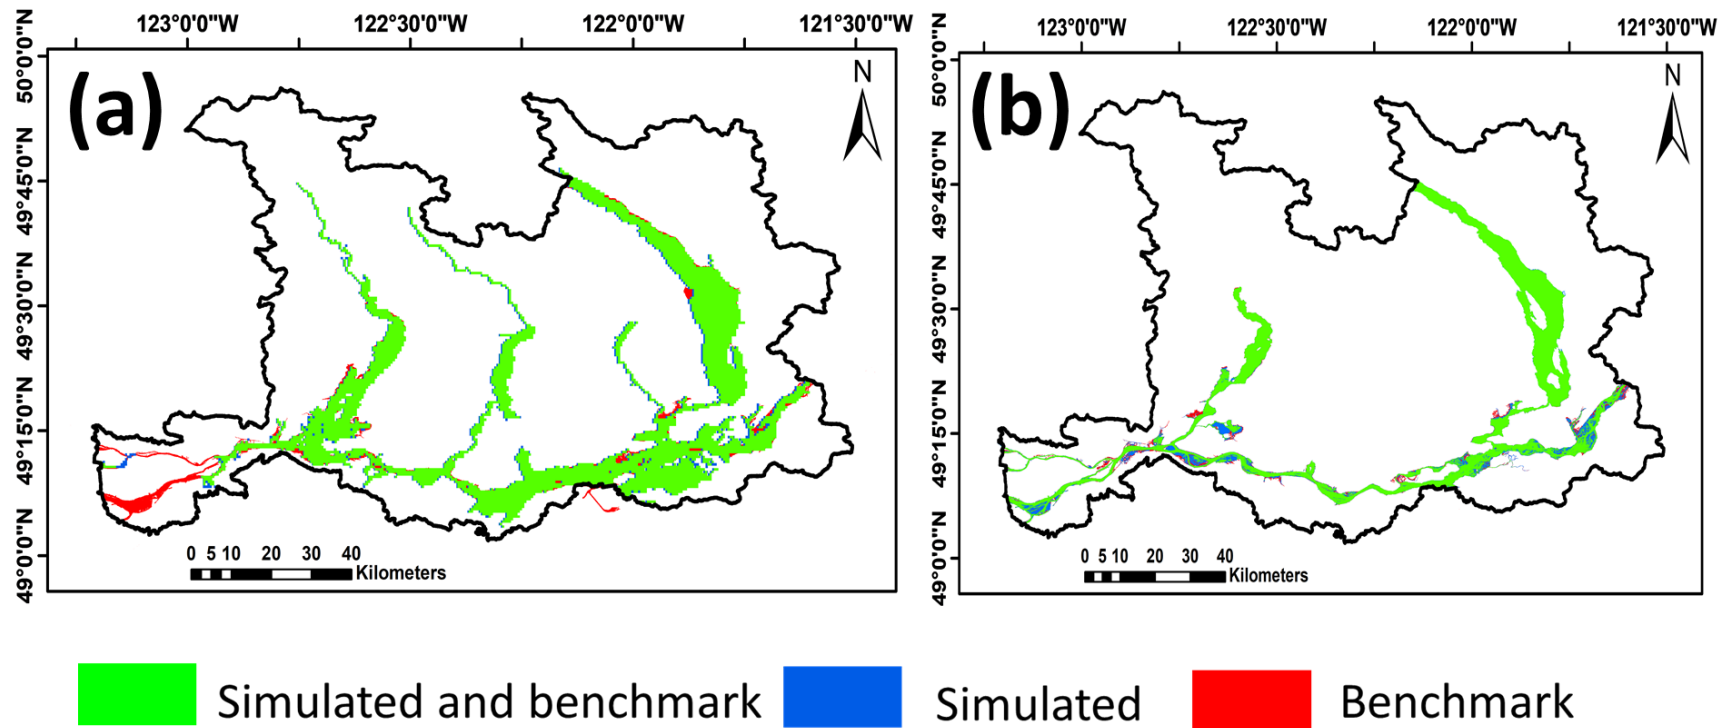

**Figure S1.** Comparison of simulated and benchmark floodplain maps derived for (a) 100 and (b) 200-year return periods for Lower Fraser Basin

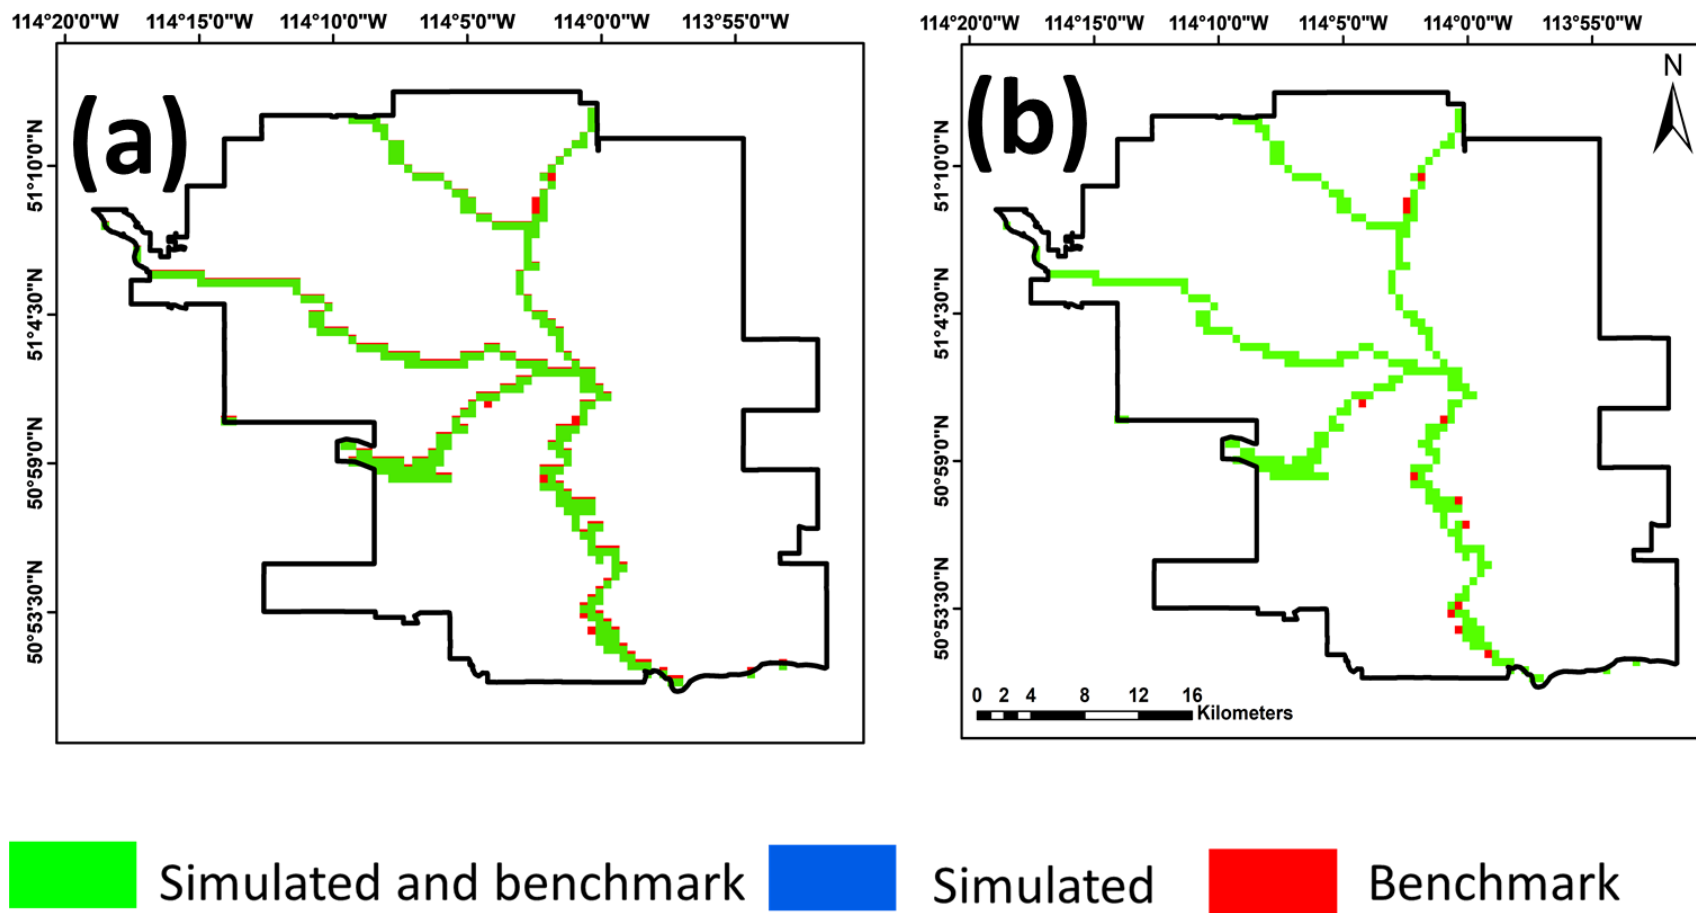

Figure S2. Comparison of simulated and benchmark floodplain maps derived for (a) 100 and (b) 200-year return periods for Calgary Basin

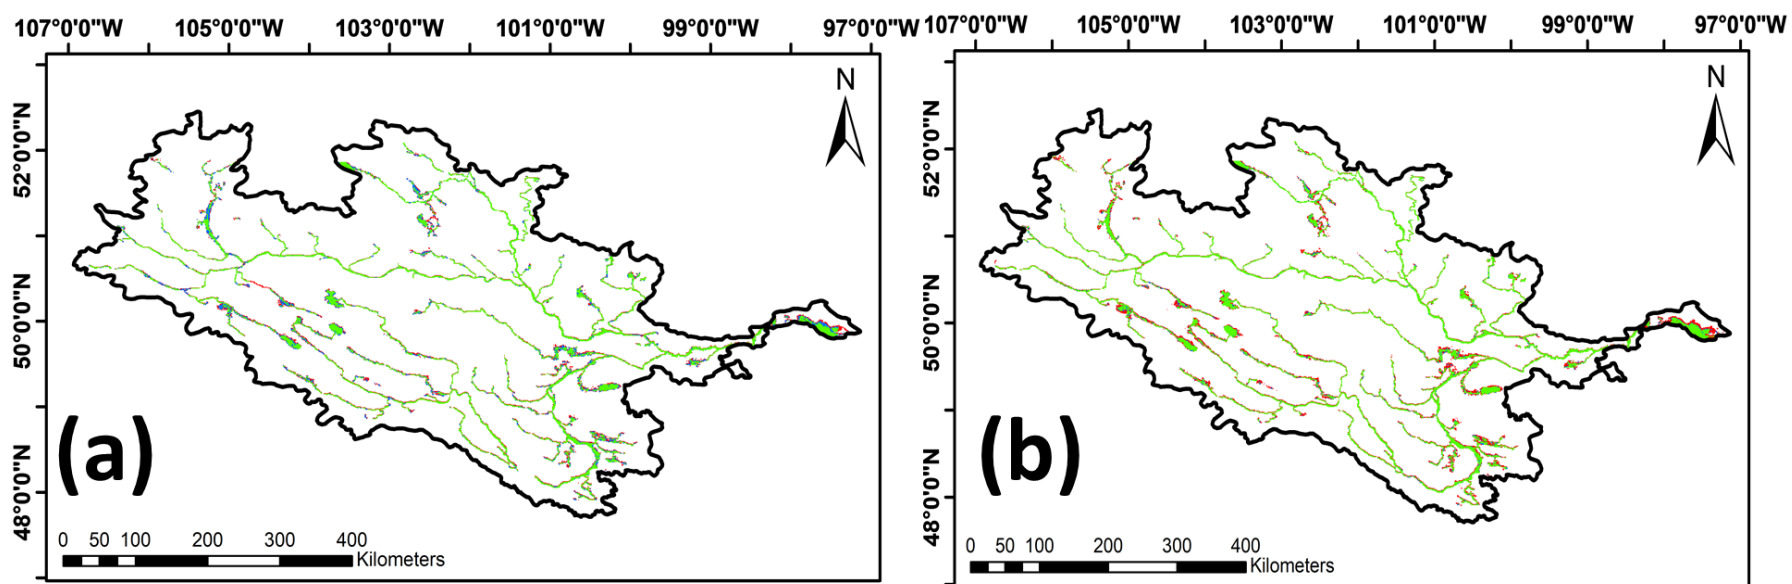

Simulated and benchmark
  Simulated
  Benchmark

**Figure S3.** Comparison of simulated and benchmark floodplain maps derived for (a) 100 and (b) 200-year return periods for Assiniboine Basin

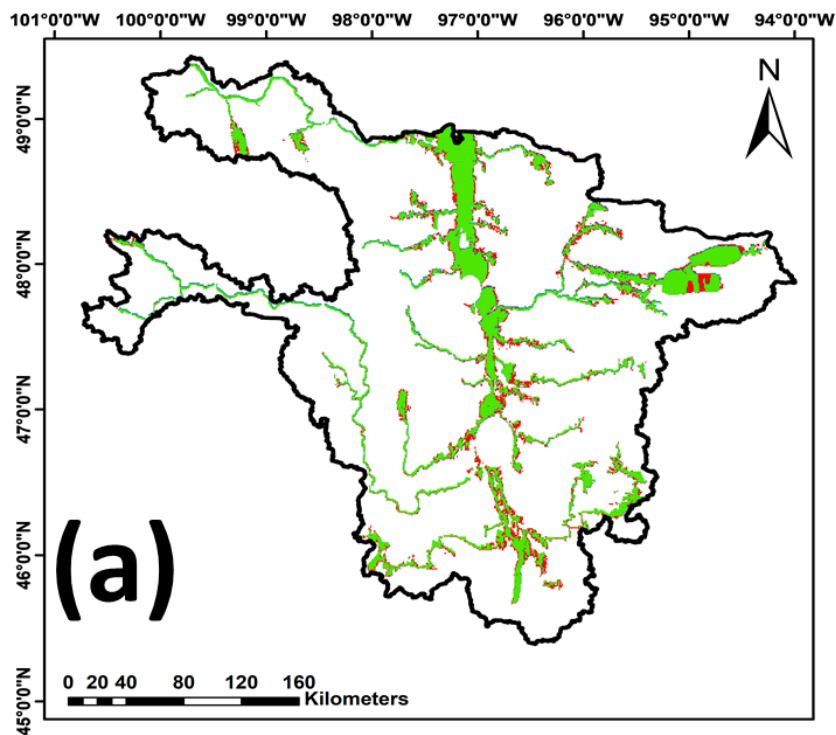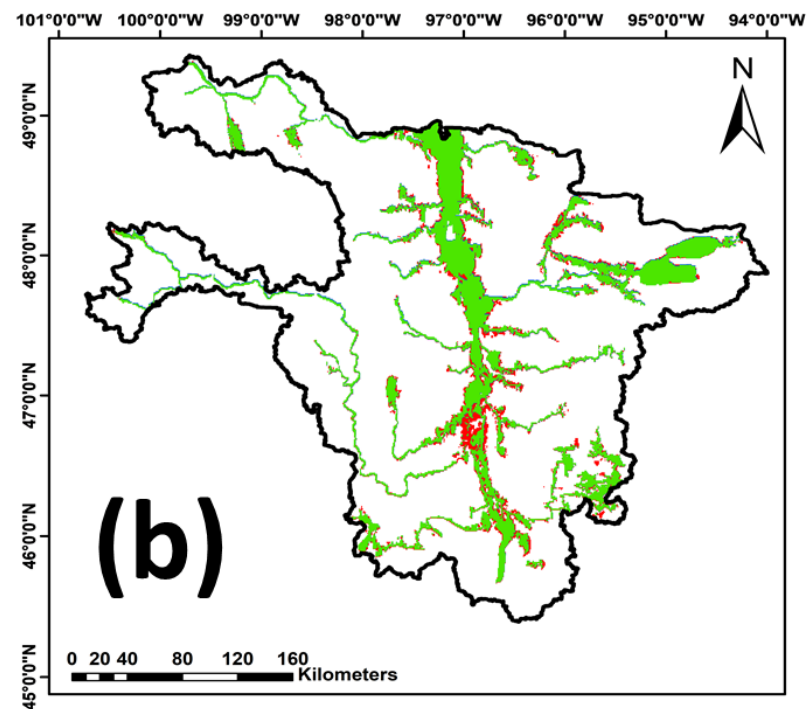

Simulated and benchmark
  Simulated
  Benchmark

**Figure S4.** Comparison of simulated and benchmark floodplain maps derived for (a) 100 and (b) 200-year return periods for Red River Basin

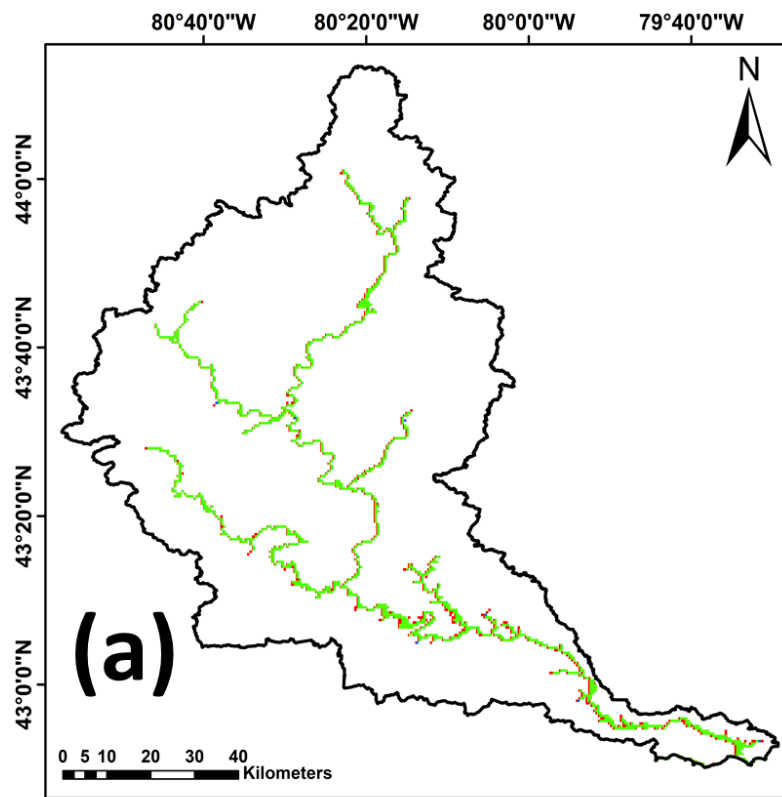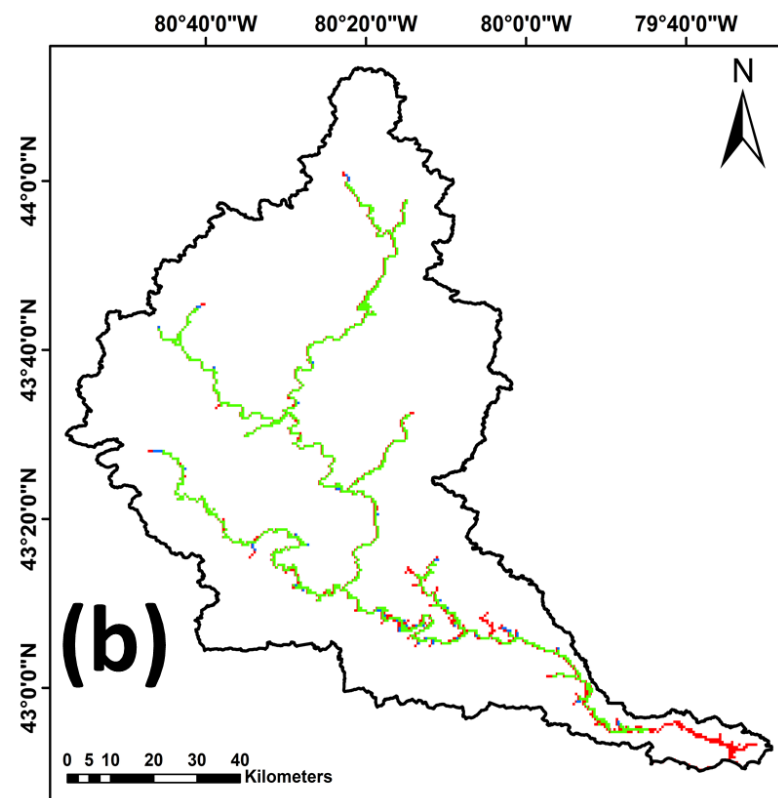

Simulated and benchmark
  Simulated
  Benchmark

**Figure S5.** Comparison of simulated and benchmark floodplain maps derived for (a) 100 and (b) 200-year return periods for Grand River Basin

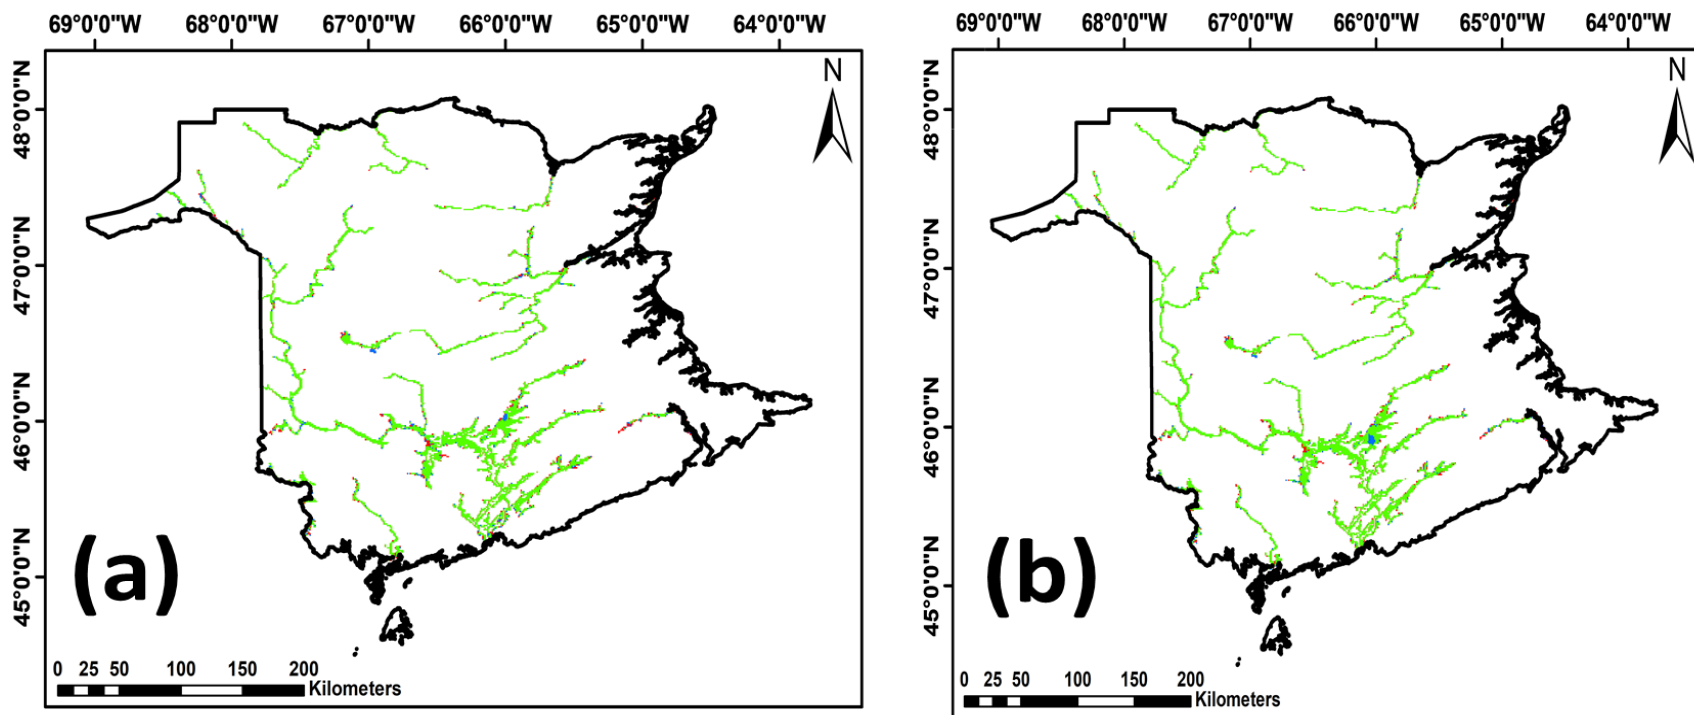

Simulated and benchmark
  Simulated
  Benchmark

**Figure S6.** Comparison of simulated and benchmark floodplain maps derived for (a) 100 and (b) 200-year return periods for St. John Basin
